# Supplementary material for: Streamlined Genetic Manipulation of Diverse Bacteroides and Parabacteroides Isolates from the Human Gut Microbiota
Source: PubMed Central journal article supplement (PMC6692515; doi:10.1128/mbio.01762-19), 2019-08-13
Supplement: mBio.01762-19-st002.pdf [file mBio.01762-19-st002.pdf]

**Table S2. Primers**

| Name    | Sequence                                       | Use                                                                        |
|---------|------------------------------------------------|----------------------------------------------------------------------------|
| oLGB1   | TGTATGAATCCAACAGTTGCATGTGGCCTATTGT             | pLGB13 construction                                                        |
| oLGB2   | ACATGCAACTGTTGGATTTCATACAAGCGGTCG              | pLGB13 construction                                                        |
| oLGB29  | ATCCCCCGGCTGCATGGCATAGCTACCGGTGGTAC            | pLGB18 construction                                                        |
| oLGB30  | TGCCTTTAATTCTGAAAGGGATTTCTGACCGTTC             | pLGB18 construction                                                        |
| oLGB31  | GGAAATCCCTTTCAGAATTAAGGCAACCGTGTG              | pLGB18 construction                                                        |
| oLGB32  | GGTATCGATAAGCTTGATTGGTCTTTCATCGCGTATCC         | pLGB18 construction                                                        |
| oLGB33  | GTTTCCGGTTGCGATAAGAG                           | T6SS deletion PCR verification in <i>Bfi</i> CL09                          |
| oLGB34  | ATTTGGCGTTTCTGTCAAC                            | T6SS deletion PCR verification in <i>Bfi</i> CL09                          |
| oLGB43  | CGCATCATCAGAACGGTAAGTC                         | T6SS deletion PCR verification in <i>Bfi</i> CL09                          |
| oLGB78  | ACAATAGGCCACATGCAACTG                          | pLGB28 construction                                                        |
| oLGB85  | GTTTAACTAGCTCTAATACCATCTGACATGAA               | pLGB28 construction                                                        |
| oLGB86  | AGTTGCATGTGGCCTATTGTTTATGGCTTCAACTTATGAAC      | pLGB28, pLGB31 construction                                                |
| oLGB91  | TGGTATTAGAGCTAGTTAAACTTACCGTATCCGGGA           | pLGB28 construction                                                        |
| oLGB104 | CATATGGCCTAATGCTTAGTATTATGAAGAACAATAAAT        | pLGB28 construction                                                        |
| oLGB105 | CTTCTTCCAGATCACTCTTTAAGAGAAACTCTTCGGG          | pLGB28 construction                                                        |
| oLGB106 | TCTCTTAAAGAGTGATCTGGAAGAAGCAATGAAAG            | pLGB28 construction                                                        |
| oLGB107 | CATAATACTAAGCATTAGTGCATATGTTAAAAACAGATTGG      | pLGB28 construction                                                        |
| oLGB108 | CGGATGCTTATTATTTTCGGAGAAAACATGCATAAATC         | pLGB30 construction                                                        |
| oLGB109 | ATTTTCTTCATGGTATTTTGTCTATATATTTAAGGTATCCATTTAC | pLGB30, pLGB31 construction                                                |
| oLGB110 | GACAAAATACCATGAAGAAAATTTATCTTTGCTTGTGATG       | pLGB30, pLGB31 construction                                                |
| oLGB111 | GGGAAGAATAAGGTGGAGGGGAATCCCATG                 | pLGB30, pLGB31 construction                                                |
| oLGB112 | TCCCCTCCACCTTATCTTCCCGACCGAACG                 | pLGB30, pLGB31 construction                                                |
| oLGB113 | TCTCCGAAATAATAAGCATCCGAGGATCTG                 | pLGB30 construction                                                        |
| oLGB116 | GAATGGATAGATCATAATGCTAATCTTACACCG              | pLGB29 construction                                                        |
| oLGB117 | ACCGCTTGTATCTTAAAGACCCACTTTCACATTTAAG          | pLGB29 construction                                                        |
| oLGB118 | TGGGTCTTAAAGATAACAAGCGGTTCGGGA                 | pLGB29 construction                                                        |
| oLGB119 | TAGCATTATGATCTATCCATTCAGTTTGATTTCTCAGG         | pLGB29 construction                                                        |
| oLGB120 | ACTTATCTCCAACAATAGGCCACATGCAACTGT              | pLGB30 construction                                                        |
| oLGB121 | GGCCTATTGTTTGGAGATAAGTATATATCCCACTGTATTGC      | pLGB30 construction                                                        |
| oLGB122 | AAGAGAGAAACGTACTTACCAGTTGAACCTACGTTTCC         | pLGB30 construction                                                        |
| oLGB123 | CTGGTAAGTACGTTTCTCTCTTTAAGAGAACTCTTCGGGATG     | pLGB30 construction                                                        |
| oLGB124 | GCTTGATATCGAATTCCTGCACATCATCGACCAGTACAAGGC     | pLGB32, pLGB33 construction                                                |
| oLGB125 | ACCGCTCCATTTGGATTAAAGCAATAATACTACAGTAGATGC     | pLGB32, pLGB33 construction                                                |
| oLGB126 | TATTGCTTAATCCAAATGGAGCGGTCAGGAAAT              | pLGB32, pLGB33 construction                                                |
| oLGB127 | CCTCCACCGGGTGGCAGCATATCCCGCATACGG              | pLGB32 construction                                                        |
| oLGB128 | GGTGCCTTTCGACAATGC                             | <i>tetQ</i> deletion PCR verification in <i>Bo</i> CL09 and <i>Pm</i> CL09 |
| oLGB129 | ATACCCGTCATGGTAATG                             | <i>tetQ</i> deletion PCR verification in <i>Bo</i> CL09 and <i>Pm</i> CL09 |
| oLGB137 | CGTTGTACTGCGAGGTACC                            | pLGB28 insertion PCR verification                                          |
| oLGB138 | GGTGAAACGAGGAACAAGG                            | pLGB28 insertion PCR verification                                          |

| Name    | Sequence                                    | Use                                                                 |
|---------|---------------------------------------------|---------------------------------------------------------------------|
| oLGB139 | CGTTGTACCGCGAGGTACC                         | pLGB28 insertion PCR verification                                   |
| oLGB141 | GTGGATCCCCGGGCTGCACTATTATACGCAAATCAACAGAACG | pLGB34 construction                                                 |
| oLGB142 | CTCTTATGCAAATTTCAAAGTACTTGTTTAATAAATCTCATTG | pLGB34 construction                                                 |
| oLGB143 | AACAAGTACTTTTGAAATTTGCATAAGAGATGTCGACTG     | pLGB34 construction                                                 |
| oLGB144 | CTGGAAGATAGGCAATTAGACTTTGAAGTCGATCCTGCC     | pLGB34 construction                                                 |
| oLGB145 | TCAACAGACCCTTCTTAAGGTA                      | <i>ubb</i> deletion PCR verification in <i>Bf9343</i>               |
| oLGB146 | CTGTTAATACCGTGTCTGTATGATAC                  | <i>ubb</i> deletion PCR verification in <i>Bf9343</i>               |
| oLGB147 | GTGGATCCCCGGGCTGCAATGACTTCCAGGCATACAACC     | pLGB35 construction                                                 |
| oLGB148 | CTGGAAGATAGGCAATTAGTGTATCCAGCTGTCTGCAGAG    | pLGB35 construction                                                 |
| oLGB149 | CTAGAGGCTGAATATGAACGTG                      | <i>CK234_00400-00401</i> deletion PCR verification in <i>BvCL10</i> |
| oLGB150 | GTTCCGAACCTTCTAGTGAGC                       | <i>CK234_00400-00401</i> deletion PCR verification in <i>BvCL10</i> |
| oLGB152 | ATAAACAATAGGCCACATGCAACTGTTGGATTATACAA      | pLGB31 construction                                                 |
| oLGB153 | GGTATCGATAAGCTTGATAGCATATCCCGCATACGG        | pLGB33 construction                                                 |
| oLGB154 | CCGTGAACTGAGAGGTTCC                         | pLGB28 insertion PCR verification                                   |
| oLGB155 | CGTTGTGCTGCGAGGCAC                          | pLGB28 insertion PCR verification                                   |
| oLGB160 | ATTGACATACCTGTCCGTCGTC                      | CTn341 excision PCR verification in <i>PmCL09</i>                   |
| oLGB161 | GCATATATTGATGGTCGCCATCATC                   | CTn341 excision PCR verification in <i>PmCL09</i>                   |
| oLGB164 | CCCGTTCCATTTATAGCCCTC                       | T6SS deletion PCR verification in <i>BfiCL09</i>                    |
| oLGB165 | CCTCCACCGCGTTTATTCTTCCCGACCGAACGAG          | pLGB37 construction                                                 |
| oLGB166 | AGAGCGCCTCATAATGCTAATCTTACACCGTCCC          | pLGB37 construction                                                 |
| oLGB167 | TAGCATTATGAGGCCGCTCTAGAACTAGTGGATCC         | pLGB37 construction                                                 |
| oLGB168 | TCGGGAAGAATAAACCGCGGTGGAGGGGAATTC           | pLGB37 construction                                                 |
| oLGB169 | ACGGCTGACATGGGAATTC                         | pLGB37 insertion PCR verification                                   |
| oLGB170 | GCTTGATATCGAATTCCTGCAGC                     | pLGB37 insertion PCR verification                                   |
