# Supplementary material for: Streamlined Genetic Manipulation of Diverse Bacteroides and Parabacteroides Isolates from the Human Gut Microbiota
Source: PubMed Central journal article supplement (PMC6692515; doi:10.1128/mbio.01762-19), 2019-08-13
Supplement: mBio.01762-19-st003.pdf [file mBio.01762-19-st003.pdf]

**Table S3. Bacteroidales strains used or created in this study**

| Name                                     | Genotype                                                                              | Construction details                                                                                                               | Reference/Source                   |
|------------------------------------------|---------------------------------------------------------------------------------------|------------------------------------------------------------------------------------------------------------------------------------|------------------------------------|
| <i>B. caccae</i><br>CL03T12C61           | wild-type                                                                             | N/A                                                                                                                                | Zitomersky <i>et al.</i> ,<br>2011 |
| <i>B. cellulosilyticus</i><br>CL09T06C25 | wild-type                                                                             | N/A                                                                                                                                | Zitomersky <i>et al.</i> ,<br>2011 |
| <i>B. dorei</i><br>CL03T12C01            | wild-type                                                                             | N/A                                                                                                                                | Zitomersky <i>et al.</i> ,<br>2011 |
| <i>B. dorei</i><br>CL06T03C031           | wild-type                                                                             | N/A                                                                                                                                | Zitomersky <i>et al.</i> ,<br>2011 |
| <i>B. eggerthii</i><br>CL11T00C20        | wild-type                                                                             | N/A                                                                                                                                | Zitomersky <i>et al.</i> ,<br>2011 |
| <i>B. finegoldii</i><br>CL09T03C10       | wild-type                                                                             | N/A                                                                                                                                | Zitomersky <i>et al.</i> ,<br>2011 |
| <i>B. fragilis</i><br>CL03T12C07         | wild-type                                                                             | N/A                                                                                                                                | Zitomersky <i>et al.</i> ,<br>2011 |
| <i>B. fragilis</i><br>CL05T12C13         | wild-type                                                                             | N/A                                                                                                                                | Zitomersky <i>et al.</i> ,<br>2011 |
| <i>B. ovatus</i><br>CL06T03C20           | wild-type                                                                             | N/A                                                                                                                                | Zitomersky <i>et al.</i> ,<br>2011 |
| <i>B. ovatus</i><br>CL09T03C03           | wild-type                                                                             | N/A                                                                                                                                | Zitomersky <i>et al.</i> ,<br>2011 |
| <i>B. stercoris</i><br>CL09T03C01        | wild-type                                                                             | N/A                                                                                                                                | Zitomersky <i>et al.</i> ,<br>2011 |
| <i>B. thetaiotaomicron</i><br>CL06T03C18 | wild-type                                                                             | N/A                                                                                                                                | Zitomersky <i>et al.</i> ,<br>2011 |
| <i>B. thetaiotaomicron</i><br>CL11T00C24 | wild-type                                                                             | N/A                                                                                                                                | Zitomersky <i>et al.</i> ,<br>2011 |
| <i>B. uniformis</i><br>CL12T12C23        | wild-type                                                                             | N/A                                                                                                                                | Zitomersky <i>et al.</i> ,<br>2011 |
| <i>B. vulgatus</i><br>CL06T03C24         | wild-type                                                                             | N/A                                                                                                                                | Zitomersky <i>et al.</i> ,<br>2011 |
| <i>B. vulgatus</i><br>CL09T03C04         | wild-type                                                                             | N/A                                                                                                                                | Zitomersky <i>et al.</i> ,<br>2011 |
| <i>B. vulgatus</i><br>CL10T00C06         | wild-type                                                                             | N/A                                                                                                                                | Zitomersky <i>et al.</i> ,<br>2011 |
| <i>B. vulgatus</i><br>CL11T00C01         | wild-type                                                                             | N/A                                                                                                                                | Zitomersky <i>et al.</i> ,<br>2011 |
| <i>B. xylanisolvens</i><br>CL03T12C04    | wild-type                                                                             | N/A                                                                                                                                | Zitomersky <i>et al.</i> ,<br>2011 |
| <i>P. merdae</i><br>CL06T03C08           | wild-type                                                                             | N/A                                                                                                                                | Zitomersky <i>et al.</i> ,<br>2011 |
| <i>P. merdae</i><br>CL09T00C40           | wild-type                                                                             | N/A                                                                                                                                | Zitomersky <i>et al.</i> ,<br>2011 |
| <i>B. fragilis</i> NCTC<br>9343          | wild-type                                                                             | N/A                                                                                                                                | ATCC. Cato &<br>Johnson, 1976      |
| <i>Bca</i> CL03QpLGB28                   | <i>B. caccae</i> CL03T12C61 with pLGB28<br>integrated at <i>attBT2</i> site           | Conjugal transfer of pLGB28 into <i>B.</i><br><i>caccae</i> CL03T12C61, PCR confirmation<br>using oLGB138 and oLGB139              | This study                         |
| <i>Bce</i> CL09QpLGB28                   | <i>B. cellulosilyticus</i> CL09T06C25 with<br>pLGB28 integrated at <i>attBT2</i> site | Conjugal transfer of pLGB28 into <i>B.</i><br><i>cellulosilyticus</i> CL09T06C25, PCR<br>confirmation using oLGB138 and<br>oLGB137 | This study                         |

| Name                  | Genotype                                                                                         | Construction details                                                                                                                                         | Reference/Source |
|-----------------------|--------------------------------------------------------------------------------------------------|--------------------------------------------------------------------------------------------------------------------------------------------------------------|------------------|
| <i>Bd</i> CL03ΩpLGB28 | <i>B. dorei</i> CL03T12C01 with pLGB28 integrated at <i>attBT2</i> site                          | Conjugal transfer of pLGB28 into <i>B. dorei</i> CL03T12C01, PCR confirmation using oLGB138 and oLGB137                                                      | This study       |
| <i>Bd</i> CL06ΩpLGB28 | <i>B. dorei</i> CL06T03C031 with pLGB28 integrated at <i>attBT2</i> site                         | Conjugal transfer of pLGB28 into <i>B. dorei</i> CL06T03C031, PCR confirmation using oLGB138 and oLGB137                                                     | This study       |
| <i>Bo</i> CL06ΩpLGB28 | <i>B. ovatus</i> CL06T03C20 with pLGB28 integrated at <i>attBT2</i> site                         | Conjugal transfer of pLGB28 into <i>B. ovatus</i> CL06T03C20, PCR confirmation using oLGB138 and oLGB137                                                     | This study       |
| <i>Bo</i> CL09ΩpLGB28 | <i>B. ovatus</i> CL09T03C03 with pLGB28 integrated at <i>attBT2</i> site                         | Conjugal transfer of pLGB28 into <i>B. ovatus</i> CL09T03C03, PCR confirmation using oLGB138 and oLGB137                                                     | This study       |
| <i>Bs</i> CL09ΩpLGB28 | <i>B. stercoris</i> CL09T03C01 with pLGB28 integrated at <i>attBT2</i> site                      | Conjugal transfer of pLGB28 into <i>B. stercoris</i> CL09T03C01, PCR confirmation using oLGB138 and oLGB155                                                  | This study       |
| <i>Bt</i> CL06ΩpLGB28 | <i>B. thetaiotaomicron</i> CL06T03C18 with pLGB28 integrated at <i>attBT2</i> site               | Conjugal transfer of pLGB28 into <i>B. thetaiotaomicron</i> CL06T03C18, PCR confirmation using oLGB138 and oLGB137+oLGB139                                   | This study       |
| <i>Bt</i> CL11ΩpLGB28 | <i>B. thetaiotaomicron</i> CL11T00C24 with pLGB28 integrated at <i>attBT2</i> site               | Conjugal transfer of pLGB28 into <i>B. thetaiotaomicron</i> CL11T00C24, PCR confirmation using oLGB138 and oLGB137+oLGB139                                   | This study       |
| <i>Bu</i> CL12ΩpLGB28 | <i>B. uniformis</i> CL12T12C23 with pLGB28 integrated at <i>attBT2</i> site                      | Conjugal transfer of pLGB28 into <i>B. uniformis</i> CL12T12C23, PCR confirmation using oLGB138 and oLGB155                                                  | This study       |
| <i>Bv</i> CL06ΩpLGB28 | <i>B. vulgatus</i> CL06T03C24 with pLGB28 integrated at <i>attBT2</i> site                       | Conjugal transfer of pLGB28 into <i>B. vulgatus</i> CL06T03C24, PCR confirmation using oLGB138 and oLGB137                                                   | This study       |
| <i>Bv</i> CL09ΩpLGB28 | <i>B. vulgatus</i> CL09T03C04 with pLGB28 integrated at <i>attBT2</i> site                       | Conjugal transfer of pLGB28 into <i>B. vulgatus</i> CL09T03C04, PCR confirmation using oLGB138 and oLGB137                                                   | This study       |
| <i>Bv</i> CL11ΩpLGB28 | <i>B. vulgatus</i> CL11T00C01 with pLGB28 integrated at <i>attBT2</i> site                       | Conjugal transfer of pLGB28 into <i>B. vulgatus</i> CL11T00C01, PCR confirmation using oLGB138 and oLGB137                                                   | This study       |
| <i>Pm</i> CL09ΩpLGB28 | <i>P. merdae</i> CL09T00C40 with pLGB28 integrated at <i>attBT2</i> site                         | Conjugal transfer of pLGB28 into <i>P. merdae</i> CL09T00C40, PCR confirmation using oLGB138 and oLGB154                                                     | This study       |
| <i>Bv</i> CL11ΩpLGB32 | <i>B. vulgatus</i> CL11T00C01 with pLGB32 integration                                            | Conjugal transfer of pLGB32 into <i>B. vulgatus</i> CL11T00C01, PCR confirmation using oLGB128 and oLGB129                                                   | This study       |
| <i>Bo</i> CL09ΩpLGB32 | <i>B. ovatus</i> CL09T03C03 with pLGB32 integration                                              | Conjugal transfer of pLGB32 into <i>B. ovatus</i> CL09T03C03, PCR confirmation using oLGB128 and oLGB129                                                     | This study       |
| LGB43                 | <i>B. finegoldii</i> CL09T03C10, deletion of the GA1 T6SS (HMPREF1057_01517 to HMPREF1057_01551) | Conjugal transfer of pLGB18 into <i>B. finegoldii</i> , counterselection, PCR confirmation using oLGB33 and oLGB34 (set 1+2) or oLGB43 and oLGB164 (set 3+4) | This study       |

| Name  | Genotype                                                                | Construction details                                                                                                                    | Reference/Source |
|-------|-------------------------------------------------------------------------|-----------------------------------------------------------------------------------------------------------------------------------------|------------------|
| LGB82 | <i>B. ovatus</i> CL09T03C03 $\Delta tetQ$ (AA414_04155)                 | Conjugal transfer of pLGB32 into <i>B. ovatus</i> , counterselection, PCR confirmation using oLGB128 and oLGB129                        | This study       |
| LGB83 | <i>P. merdae</i> CL09T00C40 with CTn341 excision                        | Conjugal transfer of pLGB33 into <i>P. merdae</i> , counterselection, PCR confirmation using oLGB128 and oLGB129 or oLGB160 and oLGB161 | This study       |
| LGB84 | <i>B. fragilis</i> NCTC 9343 $\Delta ubb$ (BF9343_3779)                 | Conjugal transfer of pLGB34 into <i>B. fragilis</i> , counterselection, PCR confirmation using oLGB145 and oLGB146                      | This study       |
| LGB85 | <i>B. vulgatus</i> CL10T00C06 $\Delta CK234_00400-00401$                | Conjugal transfer of pLGB35 into <i>B. vulgatus</i> , counterselection, PCR confirmation using oLGB149 and oLGB150                      | This study       |
| LGB86 | <i>B. fragilis</i> DS_166 with pLGB37 integrated at <i>attBT2</i> site  | Conjugal transfer of pLGB37 into <i>B. fragilis</i> , PCR confirmation using oLGB169 and oLGB170                                        | This study       |
| LGB87 | <i>B. fragilis</i> US326 with pLGB37 integrated at <i>attBT2</i> site   | Conjugal transfer of pLGB37 into <i>B. fragilis</i> , PCR confirmation using oLGB169 and oLGB170                                        | This study       |
| LGB88 | <i>B. fragilis</i> S36_L11 with pLGB37 integrated at <i>attBT2</i> site | Conjugal transfer of pLGB37 into <i>B. fragilis</i> , PCR confirmation using oLGB169 and oLGB170                                        | This study       |

## References

- Cato EP, Johnson JL.(1976) Reinstatement of species rank for *Bacteroides fragilis*, *B. ovatus*, *B. distasonis*, *B. thetaiotaomicron*, and *B. vulgatus*: Designation of neotype strains for *Bacteroides fragilis* (Veillon and Zuber) Castellani and Chalmers and *Bacteroides thetaiotaomicron* (Distaso) Castellani and Chalmers. *Int. J. Syst. Bacteriol.* 26: 230-237.
- Zitomersky,N.L., Coyne,M.J. and Comstock,L.E. (2011) Longitudinal Analysis of the Prevalence, Maintenance, and IgA Response to Species of the Order Bacteroidales in the Human Gut. *Infection and Immunity*, **79**, 2012–2020.
