# Supplementary material for: Streamlined Genetic Manipulation of Diverse Bacteroides and Parabacteroides Isolates from the Human Gut Microbiota
Source: mBio. 2019 Aug 13;10(4):e01762-19. doi: 10.1128/mBio.01762-19 (PMC6692515; doi:10.1128/mBio.01762-19)
Supplement: TABLE S1 [file mBio.01762-19-st001.pdf]

**Table S1. Plasmids and construction details**

| Name                                 | Description                                                                                                                                                             | Construction details                                                                                                                                                                                                                                                                                                                                                                                                                                                                                                                                                                              | Reference/Source        |
|--------------------------------------|-------------------------------------------------------------------------------------------------------------------------------------------------------------------------|---------------------------------------------------------------------------------------------------------------------------------------------------------------------------------------------------------------------------------------------------------------------------------------------------------------------------------------------------------------------------------------------------------------------------------------------------------------------------------------------------------------------------------------------------------------------------------------------------|-------------------------|
| pNBU2- <i>bla-ermGb</i>              | Integration at chromosomal <i>attBT2</i> site present in most <i>Bacteroides</i> and <i>Parabacteroides</i> isolates, erythromycin resistance                           |                                                                                                                                                                                                                                                                                                                                                                                                                                                                                                                                                                                                   | Koropatkin et al., 2008 |
| pNBU2- <i>erm</i> -TetR-P1T_DP-GH023 | Integration at <i>attBT2</i> site, cassette with P1T_DP aTC-inducible promoter (RBS GH023) and constitutively-driven TetR repressor                                     |                                                                                                                                                                                                                                                                                                                                                                                                                                                                                                                                                                                                   | Lim et al., 2017        |
| pLGB13                               | Suicide vector for allelic exchange. Erythromycin resistance cassette for co-integrate selection, aTC-inducible expression of ssBfe1 toxin for counter-selection        | <p>1) Chemically synthesized cassette (Genscript) containing a periplasmic localization signal (first 63 bp of <i>BT_4676</i> from <i>B. thetaiotaomicron</i> VPI-5482) fused to the <i>bfe1</i> gene (BF638R_1988) of <i>B. fragilis</i> 638R. (Lim et al., 2017)</p> <p>2) Using NEBuilder assembly, this cassette was cloned into the NcoI site of pNBU2-<i>erm</i>-TetR-P1T_DP-GH023.</p> <p>3) The resulting plasmid was used as template for PCR using oLGB1 and oLGB2, to remove the <i>attN2</i> site and the interase gene, and the resulting product was assembled using NEBuilder.</p> | This study              |
| pLGB18                               | Construct for deletion of the GA1 T6SS ( <i>HMPREF1057_01516</i> to <i>HMPREF1057_01551</i> ) in <i>B. finegoldii</i> CL09T03C10                                        | <p>NEBuilder assembly reaction to fuse:</p> <p>a) pLGB13 cut with PstI and EcoRV</p> <p>b) 2.6 kb flank upstream of <i>HMPREF1057_01516</i>, amplified using oLGB29 + oLGB30</p> <p>c) 2.5 kb flank downstream of <i>HMPREF1057_01551</i>, amplified using oLGB31 + oLGB32</p>                                                                                                                                                                                                                                                                                                                    | This study              |
| pLGB28                               | Integration at chromosomal <i>attB2</i> site present in most <i>Bacteroides</i> and <i>Parabacteroides</i> isolates, inulin utilization cassette for positive selection | <p>NEBuilder assembly reaction to fuse:</p> <p>a) pNBU2 backbone excluding <i>ermG</i> cassette, amplified with oLGB78 and oLGB105</p> <p>b) PBT1311 promoter and RBS, amplified from pMM553 (Mimee et al., 2015) using oLGB106 and oLGB107</p> <p>c) <i>BACOVA_04504</i> and <i>BACOVA_04505</i> from <i>B. ovatus</i> ATCC 8483, amplified using oLGB104 and oLGB91</p> <p>d) <i>BACOVA_04501</i> from <i>B. ovatus</i> ATCC 8483, amplified using oLGB85+86</p>                                                                                                                                | This study              |

| Name   | Description                                                                                                                                                           | Construction details                                                                                                                                                                                                                                                                                                                                                                                                                                                                                                                                                                              | Reference/Source |
|--------|-----------------------------------------------------------------------------------------------------------------------------------------------------------------------|---------------------------------------------------------------------------------------------------------------------------------------------------------------------------------------------------------------------------------------------------------------------------------------------------------------------------------------------------------------------------------------------------------------------------------------------------------------------------------------------------------------------------------------------------------------------------------------------------|------------------|
| pLGB29 | Suicide vector for allelic exchange. Inulin utilization cassette for co-integrate selection, aTC-inducible expression of ssBfe1 toxin for counter-selection           | NEBuilder assembly reaction to fuse:<br>a) pLGB28 backbone excluding the <i>attN2</i> site and integrase gene, amplified with oLGB118 and oLGB119<br>b) counter-selection cassette, amplified from pLGB13 using oLGB116 and oLGB117                                                                                                                                                                                                                                                                                                                                                               | This study       |
| pLGB30 | Suicide vector for allelic exchange. Tetracycline resistance cassette for co-integrate selection, rhamnose-inducible expression of ssBfe1 toxin for counter-selection | NEBuilder assembly reaction to fuse:<br>a) rhamnose promoter, amplified from gene <i>BT_3763</i> from <i>B. thetaiotaomicron</i> VPI-5482, using oLGB108 and oLGB109<br>b) <i>ss-bfe1</i> gene and MCS, amplified from pLGB13, using oLGB110 and oLGB120<br>c) tetracycline resistance cassette, amplified from vector pYT646b (Tang and Malamy, 2000), using oLGB121 and oLGB122<br>d) origin of transfer and replication, amplified from pLGB13 using oLGB111 and oLGB123<br>e) RhaR cassette ( <i>BT_3768</i> ), amplified from <i>B. thetaiotaomicron</i> VPI-5482, using oLGB112 and oLGB113 | This study       |
| pLGB31 | Suicide vector for allelic exchange. Inulin utilization cassette for co-integrate selection, rhamnose-inducible expression of ssBfe1 toxin for counter-selection      | NEBuilder assembly reaction to fuse:<br>a) <i>ss-bfe1</i> gene and MCS, amplified from pLGB13, using oLGB110 and oLGB152<br>b) rhamnose-inducible promoter and RhaR transcription factor, amplified from pLGB30 using oLGB109 and oLGB112<br>c) vector backbone ( <i>oriT/V</i> , <i>bla</i> gene, inulin selection cassette) amplified from pLGB29 using oLGB86 and oLGB111                                                                                                                                                                                                                      | This study       |
| pLGB32 | Construct for deletion of <i>tetQ</i> in <i>B. ovatus</i> CL09T03C03 (AA414_04155)                                                                                    | NEBuilder assembly reaction to fuse:<br>a) pLGB29 cut with PstI and NotI<br>b) 1 kb flank upstream of <i>tetQ</i> , amplified using oLGB124 + oLGB125<br>c) 1 kb flank downstream of <i>tetQ</i> , amplified using oLGB126 + oLGB127                                                                                                                                                                                                                                                                                                                                                              | This study       |
| pLGB33 | Construct for deletion of <i>tetQ</i> in <i>P. merdae</i> CL09T00C40 (HMPREF1078_01857)                                                                               | NEBuilder assembly reaction to fuse:<br>a) pLGB13 cut with PstI and EcoRV<br>b) 1 kb flank upstream of <i>tetQ</i> , amplified using oLGB124 + oLGB125<br>c) 1 kb flank downstream of <i>tetQ</i> , amplified using oLGB126 + oLGB153                                                                                                                                                                                                                                                                                                                                                             | This study       |

| Name   | Description                                                                                                                                                                                                                 | Construction details                                                                                                                                                                                                                            | Reference/Source |
|--------|-----------------------------------------------------------------------------------------------------------------------------------------------------------------------------------------------------------------------------|-------------------------------------------------------------------------------------------------------------------------------------------------------------------------------------------------------------------------------------------------|------------------|
| pLGB34 | Construct for deletion of <i>ubb</i> in <i>B. fragilis</i> NCTC 9343 (BF9343_3779)                                                                                                                                          | NEBuilder assembly reaction to fuse:<br>a) pLGB30 cut with PstI and Sall<br>b) 2.5 kb flank upstream of <i>ubb</i> , amplified using oLGB141 + oLGB142<br>c) 2.5 kb flank downstream of <i>ubb</i> , amplified using oLGB143 + oLGB144          | This study       |
| pLGB35 | Construct for deletion of <i>CK234_00400-00401</i> in <i>B. vulgatus</i> CL10T00C06                                                                                                                                         | NEBuilder assembly reaction to fuse:<br>a) pLGB30 cut with PstI and Sall<br>b) 1.7 kb and 1.8 kb flanks upstream and downstream of <i>CK234_00400-00401</i> , amplified from <i>Bv</i> CL10Δ2GT (McEneany et al., 2018) using oLGB147 + oLGB148 | This study       |
| pLGB37 | Integration at chromosomal <i>attB2</i> site present in most <i>Bacteroides</i> and <i>Parabacteroides</i> isolates, erythromycin resistance cassette for positive selection, rhamnose-inducible expression of ssBfe1 toxin | NEBuilder assembly reaction to fuse:<br>a) vector backbone ( <i>oriT/V</i> , <i>bla</i> , <i>ermG</i> ) amplified from pNBU2 using oLGB167+168<br>b) rhamnose-inducible <i>ss-bfe1</i> , amplified from pLGB30 using oLGB165 and oLGB166        | This study       |

## References

- Koropatkin, N.M., Martens, E.C., Gordon, J.I. and Smith, T.J. (2008) Starch Catabolism by a Prominent Human Gut Symbiont Is Directed by the Recognition of Amylose Helices. *Structure*, **16**, 1105–1115.
- Lim, B., Zimmermann, M., Barry, N.A. and Goodman, A.L. (2017) Engineered Regulatory Systems Modulate Gene Expression of Human Commensals in the Gut. *Cell*, **169**, 547–558.e15
- McEneany, V.L., Coyne, M.J., Chatzidaki-Livanis, M. and Comstock, L.E. (2018) Acquisition of MACPF domain-encoding genes is the main contributor to LPS glycan diversity in gut *Bacteroides* species. *The ISME Journal*, **12**, 2919–2928
- Mimee, M., Tucker, A.C., Voigt, C.A. and Lu, T.K. (2015) Programming a Human Commensal Bacterium, *Bacteroides thetaiotaomicron*, to Sense and Respond to Stimuli in the Murine Gut Microbiota. *Cell Systems*, **1**, 62–71.
- Tang YP, Malmay MH. (2000) Isolation of *Bacteroides fragilis* mutants with in vivo growth defects by using Tn4400', a modified Tn4400 transposition system, and a new screening method. *Infect Immun* **68**:415– 419.
